# Supplementary material for: Autoimmune and Non-Autoimmune Comorbidities in Myasthenic Patients of East-European Descent: A Case–Control Study
Source: MDPI journal article supplement (doi:10.3390/jcm13082273), 2024-04-14
Supplement: s1 [file s1]

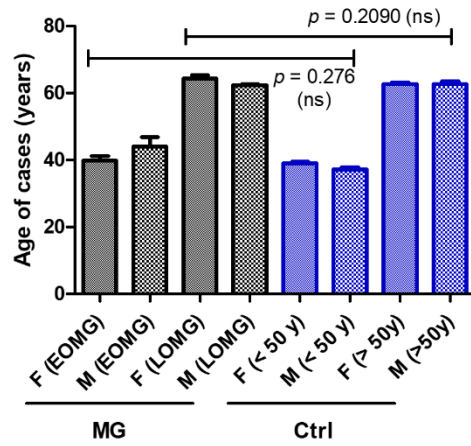

**Supplementary Figure S1. Age of MG and control cases.** Bars represent the mean  $\pm$  s.e.m for females and males for each MG group (EOMG, LOMG) and Ctrl group (< 50 years, > 50 years) (ns = not significant; two-tailed unpaired t-test).

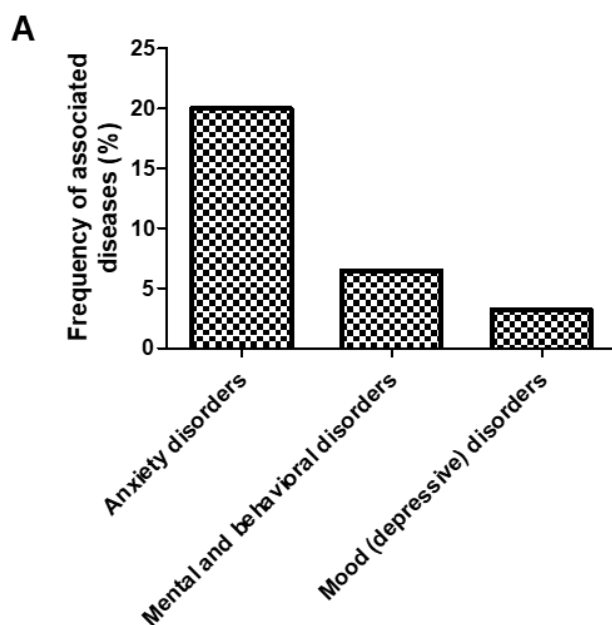

Mental, Behavioral and Neurodevelopmental disorders (F01-F99)

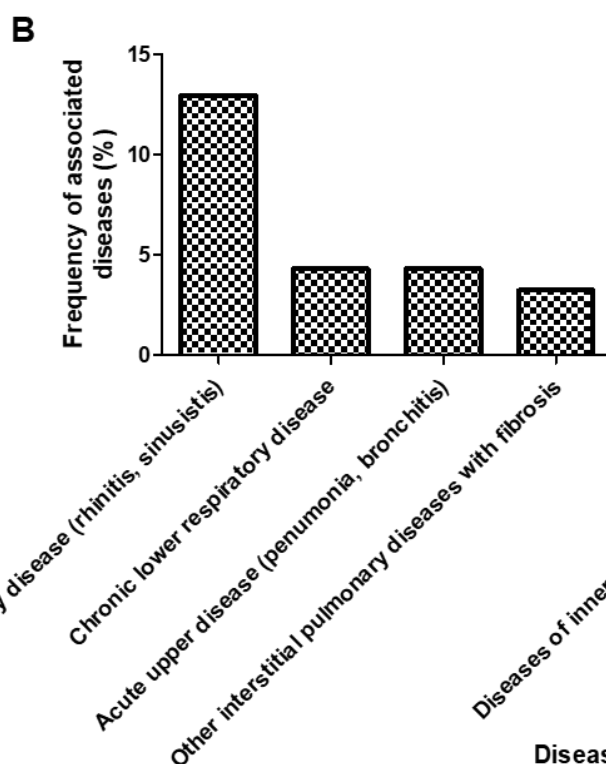

Diseases of the respiratory system (J00-J99)

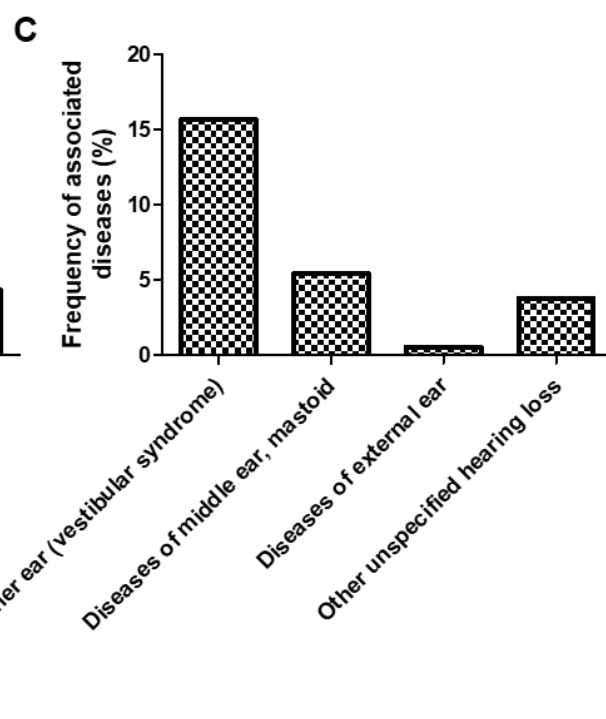

Diseases of the ear and mastoid process (H60-H95)

**Supplementary Figure S2. Proportion of MG cases associated with the indicated ICD-10 codes.**(A) Proportion of MG cases associated with the indicated mental, behavioral and neurodevelopmental disorders. (B) Proportion of MG cases associated with the indicated diseases of the respiratory system. (C) Proportion of MG cases associated with the indicated diseases of the ear and mastoid process.
